# Supplementary material for: Gender Differences in the Impact of New-Onset Atrial Fibrillation on Long-Term Risk of Ischemic Stroke after Acute Myocardial Infarction
Source: MDPI journal article supplement (doi:10.3390/jcm10215141), 2021-11-01
Supplement: s1 [file s1]

**Table S1.** Independent predictors of ischemic stroke after AMI.

| Variables                            | Univariate Analysis |              | Multivariate Analysis |             |          |
|--------------------------------------|---------------------|--------------|-----------------------|-------------|----------|
|                                      | HR                  | 95% CI       | HR                    | 95% CI      | <i>p</i> |
| <b>Overall population</b>            |                     |              |                       |             |          |
| Non-AF                               | 1 (reference)       |              | 1 (reference)         |             | NA       |
| NOAF                                 | 1.983               | 1.175–3.346  | 1.874                 | 1.086–3.235 | 0.024    |
| Previous AF                          | 5.969               | 3.335–10.685 | 4.001                 | 2.034–7.869 | <0.001   |
| Age                                  | 1.041               | 1.030–1.053  | 1.038                 | 1.024–1.052 | <0.001   |
| Women                                | 1.458               | 1.119–1.900  |                       |             |          |
| Body mass index (kg/m <sup>2</sup> ) | 0.932               | 0.893–0.971  | 0.957                 | 0.916–1.000 | 0.051    |
| Diabetes mellitus                    | 1.489               | 1.150–1.929  | 1.421                 | 1.077–1.876 | 0.013    |
| Hypertension                         | 1.587               | 1.228–2.052  | 1.293                 | 0.966–1.732 | 0.084    |
| Dyslipidemia                         | 0.918               | 0.638–1.320  |                       |             |          |
| Chronic kidney disease               | 1.490               | 0.554–4.008  |                       |             |          |
| Current smoker                       | 0.834               | 0.645–1.079  | 1.416                 | 1.047–1.915 | 0.024    |
| Previous HF                          | 2.522               | 1.039–6.121  |                       |             |          |
| Previous MI                          | 1.569               | 0.915–2.690  |                       |             |          |
| Previous stroke                      | 2.553               | 1.777–3.668  | 2.072                 | 1.403–3.059 | <0.001   |
| Killip class ≥ 2                     | 1.516               | 1.134–2.028  |                       |             |          |
| STEMI (vs. NSTEMI)                   | 0.924               | 0.718–1.189  |                       |             |          |
| Extent of CAD                        |                     |              |                       |             |          |
| 1 vessel disease                     | 1 (reference)       |              | 1 (reference)         |             | NA       |
| 2 vessel disease                     | 1.171               | 0.876–1.566  |                       |             |          |
| 3 vessel disease                     | 1.279               | 0.930–1.759  |                       |             |          |
| DAPT at discharge                    | 1.023               | 0.525–1.994  |                       |             |          |
| Anticoagulant at discharge           | 1.773               | 0.911–3.451  |                       |             |          |
| <b>Men</b>                           |                     |              |                       |             |          |
| Non-AF                               | 1 (reference)       |              | 1 (reference)         |             | NA       |
| NOAF                                 | 1.428               | 0.669–3.048  | 1.386                 | 0.606–3.167 | 0.439    |
| Previous AF                          | 5.246               | 2.316–11.880 | 4.135                 | 1.791–9.546 | 0.001    |
| Age                                  | 1.039               | 1.026–1.053  | 1.036                 | 1.049–1.053 | <0.001   |
| Body mass index (kg/m <sup>2</sup> ) | 0.912               | 0.864–0.962  | 0.940                 | 0.886–0.997 | 0.041    |
| Diabetes mellitus                    | 1.710               | 1.243–2.353  | 1.591                 | 1.128–2.243 | 0.008    |
| Hypertension                         | 1.563               | 1.147–2.130  | 1.329                 | 0.935–1.889 | 0.113    |
| Dyslipidemia                         | 0.883               | 0.558–1.399  |                       |             |          |
| Chronic kidney disease               | 1.823               | 0.581–5.725  |                       |             |          |
| Current smoker                       | 0.953               | 0.700–1.298  | 1.528                 | 1.073–2.177 | 0.019    |
| Previous HF                          | 2.095               | 0.519–8.457  |                       |             |          |
| Previous MI                          | 1.561               | 0.823–2.961  |                       |             |          |
| Previous stroke                      | 2.940               | 1.891–4.572  | 2.181                 | 1.337–3.558 | 0.002    |
| Killip class ≥ 2                     | 1.190               | 0.801–1.768  |                       |             |          |
| STEMI (vs. NSTEMI)                   | 0.983               | 0.719–1.344  |                       |             |          |
| Extent of CAD                        |                     |              |                       |             |          |
| 1 vessel disease                     | 1 (reference)       |              | 1 (reference)         |             | NA       |
| 2 vessel disease                     | 1.080               | 0.748–1.559  | 0.820                 | 0.549–1.224 | 0.331    |
| 3 vessel disease                     | 1.605               | 1.101–2.339  | 1.309                 | 0.878–1.951 | 0.187    |
| DAPT at discharge                    | 0.695               | 0.340–1.418  | 0.661                 | 0.320–1.363 | 0.262    |
| Anticoagulant at discharge           | 1.634               | 0.671–3.982  |                       |             |          |
| <b>Women</b>                         |                     |              |                       |             |          |
| Non-AF                               | 1 (reference)       |              | 1 (reference)         |             | NA       |
| NOAF                                 | 2.845               | 1.368–5.916  | 2.543                 | 1.209–5.352 | 0.014    |

|                                      |       |               |       |               |       |
|--------------------------------------|-------|---------------|-------|---------------|-------|
| Previous AF                          | 6.464 | 2.802–14.911  | 3.719 | 1.156–11.962  | 0.028 |
| Age                                  | 1.049 | 1.024–1.074   | 1.035 | 1.008–1.062   | 0.009 |
| Body mass index (kg/m <sup>2</sup> ) | 0.978 | 0.917–1.043   |       |               |       |
| Diabetes mellitus                    | 1.052 | 0.676–1.637   |       |               |       |
| Hypertension                         | 1.391 | 0.860–2.249   |       |               |       |
| Dyslipidemia                         | 0.962 | 0.532–1.741   |       |               |       |
| Chronic kidney disease               | 0.941 | 0.131–6.781   |       |               |       |
| Current smoker                       | 0.949 | 0.458–1.967   |       |               |       |
| Previous HF                          | 2.512 | 0.791–7.974   |       |               |       |
| Previous MI                          | 1.764 | 0.646–4.820   |       |               |       |
| Previous stroke                      | 1.840 | 0.975–3.471   | 1.897 | 0.996–3.612   | 0.051 |
| Menopause                            | 1.605 | 0.950–2.711   |       |               |       |
| Killip class ≥ 2                     | 1.953 | 1.245–3.063   | 1.736 | 1.081–2.788   | 0.023 |
| STEMI (vs. NSTEMI)                   | 0.885 | 0.574–1.363   |       |               |       |
| Extent of CAD                        |       |               |       |               |       |
| 1 vessel disease                     |       | 1 (reference) |       | 1 (reference) | NA    |
| 2 vessel disease                     | 1.293 | 0.804–2.080   |       |               |       |
| 3 vessel disease                     | 0.716 | 0.390–1.314   |       |               |       |
| DAPT at discharge                    | 3.764 | 0.523–27.069  |       |               |       |
| Anticoagulant at discharge           | 1.813 | 0.664–4.952   |       |               |       |

**Table S2.** Characteristics according to onset time of AF in the overall population ( $n = 10,137$ ).

| Variables                                                     | Non-AF ( $n = 9,637$ ) | NOAF ( $n = 370$ ) | Previous AF ( $n = 130$ )      | $p$ Value |
|---------------------------------------------------------------|------------------------|--------------------|--------------------------------|-----------|
| Age (years)                                                   | 62.9 $\pm$ 12.7        | 68.4 $\pm$ 12.1 *  | 71.6 $\pm$ 9.2 $^{+ \dagger}$  | <0.001    |
| Women (%)                                                     | 2642 (27.4)            | 118 (31.9)         | 50 (38.5)                      | 0.004     |
| Body mass index (kg/m <sup>2</sup> )                          | 24.2 $\pm$ 3.3         | 24.0 $\pm$ 3.4     | 23.8 $\pm$ 3.9                 | 0.167     |
| Diabetes mellitus (%)                                         | 3004 (31.2)            | 109 (29.5)         | 55 (42.3)                      | 0.019     |
| Hypertension (%)                                              | 4945 (51.3)            | 213 (57.6)         | 92 (70.8)                      | <0.001    |
| Dyslipidemia (%)                                              | 1575 (16.3)            | 43 (11.6)          | 17 (13.1)                      | 0.034     |
| Chronic kidney disease (%)                                    | 179 (1.9)              | 11 (3.0)           | 8 (6.2)                        | 0.003     |
| Current smoker (%)                                            | 3986 (41.4)            | 129 (34.9)         | 21 (16.2)                      | <0.001    |
| Family History of CAD (%)                                     | 294 (3.1)              | 5 (1.4)            | 1 (0.8)                        | 0.055     |
| Previous HF (%)                                               | 97 (1.0)               | 14 (3.8)           | 23 (17.7)                      | <0.001    |
| Previous MI (%)                                               | 380 (3.9)              | 28 (7.6)           | 8 (6.2)                        | 0.001     |
| Previous PAD (%)                                              | 48 (0.5)               | 5 (1.4)            | 2 (1.5)                        | 0.025     |
| Previous stroke (%)                                           | 649 (6.7)              | 37 (10.0)          | 21 (16.2)                      | <0.001    |
| SBP at admission (mmHg)                                       | 130 $\pm$ 26           | 122 $\pm$ 29*      | 127 $\pm$ 29                   | <0.001    |
| DBP at admission (mmHg)                                       | 79 $\pm$ 16            | 75 $\pm$ 18*       | 78 $\pm$ 18                    | <0.001    |
| HR at admission (bpm)                                         | 78 $\pm$ 18            | 82 $\pm$ 24*       | 84 $\pm$ 25 <sup>+</sup>       | <0.001    |
| Killip class $\geq 2$ (%)                                     | 2122 (22.0)            | 177 (47.8)         | 52 (40.3)                      | <0.001    |
| LV ejection fraction (%)                                      | 53.6 $\pm$ 11.0        | 49.8 $\pm$ 12.6 *  | 49.5 $\pm$ 11.5 <sup>+</sup>   | <0.001    |
| LA AP diameter (mm)                                           | 36.7 $\pm$ 5.9         | 40.2 $\pm$ 8.3 *   | 46.6 $\pm$ 8.4 $^{+ \dagger}$  | <0.001    |
| eGFR <sub>MDRD</sub> (mL/m <sup>2</sup> /1.73m <sup>2</sup> ) | 64.6 $\pm$ 23.8        | 56.2 $\pm$ 23.7 *  | 50.0 $\pm$ 22.4 $^{+ \dagger}$ | <0.001    |
| HbA1c (%)                                                     | 6.6 $\pm$ 1.6          | 6.4 $\pm$ 1.3      | 6.7 $\pm$ 1.6                  | 0.095     |
| Total cholesterol (mg/dL)                                     | 178.8 $\pm$ 43.3       | 165.8 $\pm$ 42.1 * | 156.8 $\pm$ 43.6 <sup>+</sup>  | <0.001    |
| Triglyceride (mg/dL)                                          | 125.8 $\pm$ 93.5       | 105.1 $\pm$ 67.2 * | 92.2 $\pm$ 53.7 <sup>+</sup>   | <0.001    |
| HDL cholesterol (mg/dL)                                       | 40.9 $\pm$ 10.9        | 41.1 $\pm$ 11.2    | 41.5 $\pm$ 11.2                | 0.844     |
| LDL cholesterol (mg/dL)                                       | 114.2 $\pm$ 37.9       | 103.2 $\pm$ 37.3 * | 100.0 $\pm$ 36.0 <sup>+</sup>  | <0.001    |
| Peak CK (U/L)                                                 | 444 (150,1455)         | 473 (141,1366)     | 316 (132,784) $^{+ \dagger}$   | 0.003     |
| Peak CK-MB ( $\mu$ g/mL)                                      | 48.2 (14.0,146.3)      | 41.7 (15.6,125.6)  | 29.1 (7.7,110.3) $^{\dagger}$  | 0.019     |
| Peak TnI (ng/mL)                                              | 22.7 (4.4,52.5)        | 20.8 (5.6,50.0)    | 19.4 (2.1,53.9)                | 0.188     |
| STEMI (%)                                                     | 5180 (53.8)            | 195 (52.7)         | 55 (42.3)                      | 0.032     |
| Extent of CAD (%)                                             |                        |                    |                                |           |
| One vessel disease                                            | 4412 (45.8)            | 191 (51.6)         | 55 (42.3)                      | 0.061     |
| Two vessel disease                                            | 3144 (32.6)            | 122 (33.0)         | 44 (33.8)                      | 0.949     |
| Three vessel disease                                          | 2081 (21.6)            | 57 (15.4)          | 31 (23.8)                      | 0.014     |
| CABG (%)                                                      | 19 (0.2)               | 1 (0.3)            | 0 (0.0)                        | 0.637     |
| CHA <sub>2</sub> DS <sub>2</sub> -VASc score                  | 2.4 $\pm$ 2.0          | 3.4 $\pm$ 2.1 *    | 4.1 $\pm$ 2.1 $^{+ \dagger}$   | <0.001    |
| Medications at discharge (%)                                  |                        |                    |                                |           |
| Aspirin (%)                                                   | 9479 (98.4)            | 362 (97.8)         | 123 (94.6)                     | 0.010     |
| P <sub>2</sub> Y <sub>12</sub> inhibitor (%)                  | 9207 (95.5)            | 362 (97.8)         | 121 (93.1)                     | 0.039     |
| DAPT (%)                                                      | 9147 (94.9)            | 355 (96.2)         | 118 (90.6)                     | 0.046     |
| Anticoagulant (%)                                             | 156 (1.6)              | 61 (16.6)          | 40 (30.8)                      | <0.001    |
| Warfarin                                                      | 144 (1.5)              | 60 (16.3)          | 39 (30.0)                      | <0.001    |
| NOAC                                                          | 12 (0.1)               | 1 (0.3)            | 1 (0.8)                        | 0.084     |
| DAPT plus anticoagulant (%)                                   | 141 (1.5)              | 58 (15.7)          | 37 (28.5)                      | <0.001    |
| Statin (%)                                                    | 9256 (96.0)            | 363 (98.1)         | 122 (94.4)                     | 0.075     |
| Beta-blocker (%)                                              | 8400 (87.2)            | 312 (84.4)         | 107 (82.8)                     | 0.123     |
| ACE inhibitor or ARB (%)                                      | 8798 (91.3)            | 350 (94.7)         | 117 (90.5)                     | 0.101     |

\*  $p < 0.05$  between Non-AF vs. NOAF; <sup>+</sup>  $p < 0.05$  between Non-AF vs. Previous AF;  $^{\dagger}$   $p < 0.05$  between NOAF vs. Previous AF.

**Table S3.** Characteristics according to onset time of AF in men ( $n = 7327$ ).

| Variables                                                     | Non-AF ( $n = 6,995$ ) | NOAF ( $n = 252$ ) | Previous AF ( $n = 80$ )           | $p$ Value |
|---------------------------------------------------------------|------------------------|--------------------|------------------------------------|-----------|
| Age (years)                                                   | 59.9 $\pm$ 12.2        | 65.7 $\pm$ 12.4 *  | 69.1 $\pm$ 9.8 $^{\dagger\dagger}$ | <0.001    |
| Body mass index (kg/m <sup>2</sup> )                          | 24.4 $\pm$ 3.1         | 24.3 $\pm$ 3.2     | 23.3 $\pm$ 2.7 $^{\dagger}$        | 0.006     |
| Diabetes mellitus (%)                                         | 1978 (28.3)            | 70 (27.8)          | 31 (38.8)                          | 0.116     |
| Hypertension (%)                                              | 3,188 (45.6)           | 124 (49.2)         | 55 (68.8)                          | <0.001    |
| Dyslipidemia (%)                                              | 1121 (16.0)            | 23 (9.1)           | 12 (15.0)                          | 0.013     |
| Chronic kidney disease (%)                                    | 120 (1.7)              | 9 (3.6)            | 3 (3.8)                            | 0.039     |
| Current smoker (%)                                            | 3726 (53.3)            | 118 (46.8)         | 20 (25.0)                          | <0.001    |
| Family History of CAD (%)                                     | 246 (3.5)              | 5 (2.0)            | 0 (0.0)                            | 0.102     |
| Previous HF (%)                                               | 40 (0.6)               | 9 (3.6)            | 16 (20.0)                          | <0.001    |
| Previous MI (%)                                               | 292 (4.2)              | 21 (8.3)           | 6 (7.5)                            | 0.004     |
| Previous PAD (%)                                              | 38 (0.5)               | 3 (1.2)            | 2 (2.5)                            | 0.037     |
| Previous stroke (%)                                           | 427 (6.1)              | 23 (9.1)           | 14 (17.5)                          | <0.001    |
| SBP at admission (mmHg)                                       | 130 $\pm$ 26           | 123 $\pm$ 29 *     | 122 $\pm$ 27 $^{\dagger}$          | <0.001    |
| DBP at admission (mmHg)                                       | 80 $\pm$ 16            | 76 $\pm$ 18 *      | 74 $\pm$ 18 $^{\dagger}$           | <0.001    |
| HR at admission (bpm)                                         | 78 $\pm$ 18            | 81 $\pm$ 22 *      | 82 $\pm$ 24                        | 0.003     |
| Killip class $\geq 2$ (%)                                     | 1382 (19.8)            | 115 (46.0)         | 34 (42.7)                          | <0.001    |
| LV ejection fraction (%)                                      | 53.9 $\pm$ 10.8        | 49.0 $\pm$ 12.5 *  | 49.2 $\pm$ 11.0 $^{\dagger}$       | <0.001    |
| LA AP diameter (mm)                                           | 36.7 $\pm$ 5.8         | 40.7 $\pm$ 8.3 *   | 46.2 $\pm$ 8.8 $^{\dagger\dagger}$ | <0.001    |
| eGFR <sub>MDRD</sub> (mL/m <sup>2</sup> /1.73m <sup>2</sup> ) | 62.7 $\pm$ 21.9        | 51.1 $\pm$ 21.2 *  | 48.2 $\pm$ 19.9 $^{\dagger}$       | <0.001    |
| HbA1c (%)                                                     | 6.6 $\pm$ 1.6          | 6.3 $\pm$ 1.3      | 6.6 $\pm$ 1.8                      | 0.086     |
| Total cholesterol (mg/dL)                                     | 177.6 $\pm$ 41.9       | 163.8 $\pm$ 39.6 * | 152.8 $\pm$ 40.4                   | <0.001    |
| Triglyceride (mg/dL)                                          | 129.5 $\pm$ 100.4      | 109.9 $\pm$ 73.0 * | 84.5 $\pm$ 45.5 $^{\dagger}$       | <0.001    |
| HDL cholesterol (mg/dL)                                       | 40.1 $\pm$ 10.4        | 40.6 $\pm$ 11.0    | 40.7 $\pm$ 11.9                    | 0.693     |
| LDL cholesterol (mg/dL)                                       | 113.5 $\pm$ 36.8       | 100.7 $\pm$ 33.9 * | 97.6 $\pm$ 33.0 $^{\dagger}$       | <0.001    |
| Peak CK (U/L)                                                 | 491 (160,1630)         | 529 (151,1392)     | 426 (153,886)                      | 0.152     |
| Peak CK-MB ( $\mu$ g/mL)                                      | 55.4 (15.2,156.4)      | 44.8 (17.9,146.0)  | 51.0 (12.7,169.7)                  | 0.533     |
| Peak TnI (ng/mL)                                              | 25.0 (4.9,55.6)        | 22.8 (8.1,50.0)    | 31.7 (7.2,72.3)                    | 0.539     |
| STEMI (%)                                                     | 3913 (55.9)            | 143 (56.7)         | 35 (43.8)                          | 0.088     |
| Extent of CAD (%)                                             |                        |                    |                                    |           |
| One vessel disease                                            | 3312 (47.3)            | 136 (54.0)         | 42 (52.5)                          | 0.080     |
| Two vessel disease                                            | 2281 (32.6)            | 79 (31.3)          | 22 (27.5)                          | 0.577     |
| Three vessel disease                                          | 1402 (20.0)            | 37 (14.7)          | 16 (20.0)                          | 0.111     |
| CABG (%)                                                      | 13 (0.2)               | 1 (0.4)            | 0 (0.0)                            | 0.478     |
| CHA <sub>2</sub> DS <sub>2</sub> -VASc score                  | 1.8 $\pm$ 1.6          | 2.7 $\pm$ 1.9 *    | 3.5 $\pm$ 2.0 $^{\dagger\dagger}$  | <0.001    |
| Medications at discharge (%)                                  |                        |                    |                                    |           |
| Aspirin (%)                                                   | 6883 (98.4)            | 249 (98.8)         | 77 (96.3)                          | 0.240     |
| P <sub>2</sub> Y <sub>12</sub> inhibitor (%)                  | 6685 (95.6)            | 246 (97.6)         | 73 (91.3)                          | 0.043     |
| DAPT (%)                                                      | 6650 (95.1)            | 245 (97.2)         | 72 (89.9)                          | 0.033     |
| Anticoagulant (%)                                             | 107 (1.5)              | 34 (13.5)          | 26 (32.5)                          | <0.001    |
| Warfarin                                                      | 100 (1.4)              | 33 (13.1)          | 26 (32.5)                          | <0.001    |
| NOAC                                                          | 7 (0.1)                | 1 (0.4)            | 0 (0.0)                            | 0.310     |
| DAPT plus anticoagulant (%)                                   | 97 (1.4)               | 34 (13.5)          | 23 (28.8)                          | <0.001    |
| Statin (%)                                                    | 6747 (96.5)            | 246 (97.7)         | 77 (96.1)                          | 0.632     |
| Beta-blocker (%)                                              | 6135 (87.7)            | 209 (82.8)         | 67 (84.2)                          | 0.060     |
| ACE inhibitor or ARB (%)                                      | 6425 (91.9)            | 237 (94.1)         | 71 (89.1)                          | 0.346     |

\*  $p < 0.05$  between Non-AF vs. NOAF;  $^{\dagger} p < 0.05$  between Non-AF vs. Previous AF  $^{\dagger\dagger} p < 0.05$  between NOAF vs. Previous AF.

**Table S4.** Characteristics according to onset time of AF in women ( $n = 2810$ ).

| Variables                                                     | Non-AF ( $n = 2,642$ ) | NOAF ( $n = 118$ ) | Previous AF ( $n = 50$ ) | $p$ Value |
|---------------------------------------------------------------|------------------------|--------------------|--------------------------|-----------|
| Age (years)                                                   | 70.8 $\pm$ 10.5        | 74.1 $\pm$ 9.1 *   | 75.5 $\pm$ 6.5 †         | <0.001    |
| Body mass index (kg/m <sup>2</sup> )                          | 23.6 $\pm$ 3.6         | 23.4 $\pm$ 3.7     | 24.5 $\pm$ 5.2           | 0.192     |
| Diabetes mellitus (%)                                         | 1,026 (38.8)           | 39 (33.1)          | 24 (48.0)                | 0.180     |
| Hypertension (%)                                              | 1757 (66.5)            | 89 (75.4)          | 37 (74.0)                | 0.075     |
| Dyslipidemia (%)                                              | 454 (17.2)             | 20 (16.9)          | 5 (10.0)                 | 0.408     |
| Chronic kidney disease (%)                                    | 59 (2.2)               | 2 (1.7)            | 5 (10.0)                 | 0.010     |
| Current smoker (%)                                            | 260 (9.8)              | 11 (9.3)           | 1 (2.0)                  | 0.164     |
| Family History of CAD (%)                                     | 48 (1.8)               | 0 (0.0)            | 1 (2.0)                  | 0.335     |
| Previous HF (%)                                               | 53 (2.0)               | 5 (4.2)            | 7 (14.0)                 | <0.001    |
| Previous MI (%)                                               | 88 (3.3)               | 7 (5.9)            | 2 (4.0)                  | 0.224     |
| Previous PAD (%)                                              | 10 (0.4)               | 2 (1.7)            | 0 (0.0)                  | 0.158     |
| Previous stroke (%)                                           | 222 (8.4)              | 14 (11.9)          | 7 (14.0)                 | 0.129     |
| SBP at admission (mmHg)                                       | 129 $\pm$ 27           | 119 $\pm$ 27 *     | 136 $\pm$ 29 †           | <0.001    |
| DBP at admission (mmHg)                                       | 77 $\pm$ 16            | 74 $\pm$ 18 *      | 83 $\pm$ 17              | 0.003     |
| HR at admission (bpm)                                         | 80 $\pm$ 19            | 85 $\pm$ 26 *      | 88 $\pm$ 27 †            | <0.001    |
| Killip class $\geq 2$ (%)                                     | 742 (28.1)             | 60 (51.4)          | 18 (36.4)                | <0.001    |
| LV ejection fraction (%)                                      | 52.7 $\pm$ 11.4        | 51.6 $\pm$ 12.7    | 50.0 $\pm$ 12.4          | 0.165     |
| LA AP diameter (mm)                                           | 36.6 $\pm$ 6.1         | 39.7 $\pm$ 8.4*    | 47.3 $\pm$ 7.6 †‡        | <0.001    |
| eGFR <sub>MDRD</sub> (mL/m <sup>2</sup> /1.73m <sup>2</sup> ) | 69.7 $\pm$ 27.7        | 67.0 $\pm$ 25.2    | 52.9 $\pm$ 25.9 †‡       | <0.001    |
| HbA1c (%)                                                     | 6.8 $\pm$ 1.5          | 6.7 $\pm$ 1.4      | 6.9 $\pm$ 1.2            | 0.781     |
| Total cholesterol (mg/dL)                                     | 182.2 $\pm$ 46.8       | 170.0 $\pm$ 46.8 * | 163.4 $\pm$ 48.1†        | 0.001     |
| Triglyceride (mg/dL)                                          | 116.0 $\pm$ 71.0       | 95.0 $\pm$ 51.7*   | 104.4 $\pm$ 63.5         | 0.005     |
| HDL cholesterol (mg/dL)                                       | 43.1 $\pm$ 11.9        | 42.0 $\pm$ 11.5    | 42.7 $\pm$ 10.1          | 0.610     |
| LDL cholesterol (mg/dL)                                       | 115.8 $\pm$ 40.5       | 108.3 $\pm$ 43.0   | 103.9 $\pm$ 40.3         | 0.030     |
| Peak CK (U/L)                                                 | 327 (121,1032)         | 400 (119,1283)     | 188 (83,397)‡            | 0.038     |
| Peak CK-MB ( $\mu$ g/mL)                                      | 34.7 (11.4,115.6)      | 36.3 (12.0,106.4)  | 10.8 (5.1,41.1) ‡        | 0.025     |
| Peak TnI (ng/mL)                                              | 14.6 (3.5,50.0)        | 17.2 (4.4,41.3)    | 7.0 (1.7,26.7)           | 0.249     |
| STEMI (%)                                                     | 1267 (48.0)            | 52 (44.1)          | 20 (40.0)                | 0.391     |
| Extent of CAD (%)                                             |                        |                    |                          |           |
| One vessel disease                                            | 1100 (41.6)            | 55 (46.6)          | 13 (26.0)                | 0.044     |
| Two vessel disease                                            | 863 (32.7)             | 43 (36.4)          | 22 (44.0)                | 0.174     |
| Three vessel disease                                          | 679 (25.7)             | 20 (16.9)          | 15 (30.0)                | 0.077     |
| CABG (%)                                                      | 6 (0.2)                | 0 (0.0)            | 0 (0.0)                  | 1.000     |
| CHA <sub>2</sub> DS <sub>2</sub> -VASc score                  | 4.2 $\pm$ 1.8          | 4.9 $\pm$ 1.9*     | 5.1 $\pm$ 1.9†           | <0.001    |
| Medications at discharge (%)                                  |                        |                    |                          |           |
| Aspirin (%)                                                   | 2,596 (98.3)           | 113 (95.8)         | 46 (92.0)                | 0.004     |
| P <sub>2</sub> Y <sub>12</sub> inhibitor (%)                  | 2,522 (95.5)           | 116 (98.3)         | 48 (96.0)                | 0.346     |
| DAPT (%)                                                      | 2,496 (94.5)           | 111 (94.1)         | 46 (91.8)                | 0.554     |
| Anticoagulant (%)                                             | 49 (1.9)               | 27 (22.9)          | 14 (28.0)                | <0.001    |
| Warfarin                                                      | 44 (1.7)               | 27 (22.9)          | 13 (26.0)                | <0.001    |
| NOAC                                                          | 5 (0.2)                | 0 (0.0)            | 1 (2.0)                  | 0.124     |
| DAPT plus anticoagulant (%)                                   | 44 (1.7)               | 24 (20.3)          | 14 (28.0)                | <0.001    |
| Statin (%)                                                    | 2509 (95.0)            | 117 (99.0)         | 45 (91.7)                | 0.052     |
| Beta-blocker (%)                                              | 2264 (85.7)            | 104 (87.9)         | 40 (80.4)                | 0.483     |
| ACE inhibitor or ARB (%)                                      | 2373 (89.8)            | 113 (95.9)         | 46 (92.7)                | 0.109     |

\*  $p < 0.05$  between Non-AF vs. NOAF; †  $p < 0.05$  between Non-AF vs. Previous AF; ‡  $p < 0.05$  between NOAF vs. Previous AF.
